# Supplementary material
Source: publisher figshare collection journal article supplement (https://gsajournals.figshare.com/ndownloader/files/22811834)
Supplement: Supplementary file 1 [file 22811834]

## Sheet: Sheet1
Table S2	DNA constructs used in this study
Number	Addgene #	Type	Name	Description	Reference	Sequence
89		plasmid	pRF4	4kb EcoRI rol-6(su1006) genomic fragment in pBluescribe	Mello et al. 1991
141		plasmid	pBluescript KS(+)	Classic cloning vector	Short et al. 1988
182		plasmid	pBluescript II SK(+)	Classic cloning vector	Alting-Mees and Short 1989
1028		plasmid	pmec-7GFPRab3Rim3'	mec-7 promoter driving GFP-rab-3	Bounoutas et al. 2009	tcgcgcgtttcggtgatgacggtgaaaacctctgacacatgcagctcccggagacggtcacagcttgtctgtaagcggatgccgggagcagacaagcccgtcagggcgcgtcagcgggtgttggcgggtgtcggggctggcttaactatgcggcatcagagcagattgtactgagagtgcaccataccacagcttttcaattcaattcatcattttttttttattcttttttttgatttcggtttctttgaaatttttttgattcggtaatctccgaacagaaggaagaacgaaggaaggagcacagacttagattggtatatatacgcatatgtagtgttgaagaaacatgaaattgcccagtattcttaacccaactgcacagaacaaaaacctgca…
1147		plasmid	pBluescript II SK(+) HpaI	pBluescript II SK(+) with HpaI in MCS	this study	ctaaattgtaagcgttaatattttgttaaaattcgcgttaaatttttgttaaatcagctcattttttaaccaataggccgaaatcggcaaaatcccttataaatcaaaagaatagaccgagatagggttgagtgttgttccagtttggaacaagagtccactattaaagaacgtggactccaacgtcaaagggcgaaaaaccgtctatcagggcgatggcccactacgtgaaccatcaccctaatcaagttttttggggtcgaggtgccgtaaagcactaaatcggaaccctaaagggagcccccgatttagagcttgacggggaaagccggcgaacgtggcgagaaaggaagggaagaaagcgaaaggagcgggcgctagggcgctggcaagtgtagc…
1238		plasmid	pUAS-mYFP	14 GAL4 binding site UAS in front of myristolated YFP	Schroeter et. al. 2006	AAGCTTAGGCCTCCAAGGCGGAGTACTGTCCTCCGGGCTGGCGGAGTACTGTCCTCCGGCAAGGTCGGAGTACTGTCCTCCGACACTAGAGGTCGGAGTACTGTCCTCCGACGCAAGGCGGAGTACTGTCCTCCGGGCTGCGGAGTACTGTCCTCCGGCAAGGTCGGAGTACTGTCCTCCGACACTAGAGGTCGGAGTACTGTCCTCCGACGCAAGGTCGGAGTACTGTCCTCCGACACTAGAGGTCGGAGTACTGTCCTCCGACGCAAGGTCGGAGTACTGTCCTCCGACACTAGAGGTCGGAGTACTGTCCTCCGACGCAAGGCGGAGTACTGTCCTCCGGGCTGGCGGAGTACTGTCCTCCGGCAAGGGTCGACTCTAGAGGGTATATAATGGATC…
1314		plasmid	pDONR221 ges-1p ANF-GFP	ges-1 promoter driving a rat pre-atrial natriuretic factor-GFP fusion	a gift of Kouichi Iwasaki	CTTTCCTGCGTTATCCCCTGATTCTGTGGATAACCGTATTACCGCCTTTGAGTGAGCTGATACCGCTCGCCGCAGCCGAACGACCGAGCGCAGCGAGTCAGTGAGCGAGGAAGCGGAAGAGCGCCCAATACGCAAACCGCCTCTCCCCGCGCGTTGGCCGATTCATTAATGCAGCTGGCACGACAGGTTTCCCGACTGGAAAGCGGGCAGTGAGCGCAACGCAATTAATACGCGTACCGCTAGCCAGGAAGAGTTTGTAGAAACGCAAAAAGGCCATCCGTCAGGATGGCCTTCTGCTTAGTTTGATGCCTGGCAGTTTATGGCGGGCGTCCTGCCCGCCACCCTCCGGGCCGTTGCTTCACAACGTTCAAATCCGCTCCCGGCGGATTTGTCCTACTC…
2200	19359	plasmid	pGH8	rab-3 promoter driving mCherry	Frøkjær-Jensen et al. 2008
2201	19327	plasmid	pCFJ90	myo-2 promoter driving mCherry	Frøkjær-Jensen et al. 2008
2202	19328	plasmid	pCFJ104	myo-3 promoter driving mCherry	Frøkjær-Jensen et al. 2008
2262		plasmid	pmec-7 Cherry gpd2 GFPRab3	mec-7 promoter driving a mCherry gpd2/3 GFP-rab-3 operon	this study	tcgcgcgtttcggtgatgacggtgaaaacctctgacacatgcagctcccggagacggtcacagcttgtctgtaagcggatgccgggagcagacaagcccgtcagggcgcgtcagcgggtgttggcgggtgtcggggctggcttaactatgcggcatcagagcagattgtactgagagtgcaccataccacagcttttcaattcaattcatcattttttttttattcttttttttgatttcggtttctttgaaatttttttgattcggtaatctccgaacagaaggaagaacgaaggaaggagcacagacttagattggtatatatacgcatatgtagtgttgaagaaacatgaaattgcccagtattcttaacccaactgcacagaacaaaaacctgca…
2267		plasmid	pmec-7 Cherry V2A GFPRab3	mec-7 promoter driving the bicistron mCherry V2A GFP-rab-3	this study	tcgcgcgtttcggtgatgacggtgaaaacctctgacacatgcagctcccggagacggtcacagcttgtctgtaagcggatgccgggagcagacaagcccgtcagggcgcgtcagcgggtgttggcgggtgtcggggctggcttaactatgcggcatcagagcagattgtactgagagtgcaccataccacagcttttcaattcaattcatcattttttttttattcttttttttgatttcggtttctttgaaatttttttgattcggtaatctccgaacagaaggaagaacgaaggaaggagcacagacttagattggtatatatacgcatatgtagtgttgaagaaacatgaaattgcccagtattcttaacccaactgcacagaacaaaaacctgca…
2818	34874	plasmid	pCFJ601	eef-1A.1 (eft-3) promoter driving Mos1 transposase	Frøkjær-Jensen et al. 2012
2900	61375	plasmid	pME-QF	Gateway Entry Vector Containing QF	Subedi et al. 2014
2965	42250	plasmid	DR274	sgRNA in vitro expression vector	Hwang et al. 2013
3032	44486	plasmid	pCFJ1272	miniMos plasmid	Frøkjær-Jensen et al. 2014
3054	46170	plasmid	pU6 klp-12 sgRNA	U6 promoter driving a klp-12 sgRNA	Friedland et al. 2013
3055		plasmid	DR274 U6	plasmid for cloning and expression of sgRNAs under C. elegans U6 promoter	this study	TGGGCCTTTCTTCGGTAGAAAATCAAAGGATCTTCttgagatcctttttttctgcgcgtaatctgctgcttgcaaacaaaaaaaccaccgctaccagcggtggtttgtttgccggatcaagagctaccaactctttttccgaggtaactggcttcagcagagcgcagataccaaatactgttcttctagtgtagccgtagttaggccaccacttcaagaactctgtagcaccgcctacatacctcgctctgctaatcctgttaccagtggctgctgccagtggcgataagtcgtgtcttaccgggttggactcaagacgatagttaccggataaggcgcagcggtcgggctgaacggggggttcgtgcacacagcccagcttggagcgaacgacctaca…
3358		plasmid	phat-5p Cherry V2A GFP-RAB-3	phat-5 promoter driving the biciston mCherry V2A GFP-rab-3	this study	tcgcgcgtttcggtgatgacggtgaaaacctctgacacatgcagctcccggagacggtcacagcttgtctgtaagcggatgccgggagcagacaagcccgtcagggcgcgtcagcgggtgttggcgggtgtcggggctggcttaactatgcggcatcagagcagattgtactgagagtgcaccataccacagcttttcaattcaattcatcattttttttttattcttttttttgatttcggtttctttgaaatttttttgattcggtaatctccgaacagaaggaagaacgaaggaaggagcacagacttagattggtatatatacgcatatgtagtgttgaagaaacatgaaattgcccagtattcttaacccaactgcacagaacaaaaacctgca…
3366		plasmid	phat-5p Cherry V2A ANF-EMD	phat-5 promoter driving the biciston mcherry V2A rat ANF-Emerald fusion	this study	tcgcgcgtttcggtgatgacggtgaaaacctctgacacatgcagctcccggagacggtcacagcttgtctgtaagcggatgccgggagcagacaagcccgtcagggcgcgtcagcgggtgttggcgggtgtcggggctggcttaactatgcggcatcagagcagattgtactgagagtgcaccataccacagcttttcaattcaattcatcattttttttttattcttttttttgatttcggtttctttgaaatttttttgattcggtaatctccgaacagaaggaagaacgaaggaaggagcacagacttagattggtatatatacgcatatgtagtgttgaagaaacatgaaattgcccagtattcttaacccaactgcacagaacaaaaacctgca…
3410		plasmid	pBS SAP II	Intermediate in creating pSAPI vector	this study	gtggcacttttcggggaaatgtgcgcggaacccctatttgtttatttttctaaatacattcaaatatgtatccgctcatgagacaataaccctgataaatgcttcaataatattgaaaaaggaagagtatgagtattcaacatttccgtgtcgcccttattcccttttttgcggcattttgccttcctgtttttgctcacccagaaacgctggtgaaagtaaaagatgctgaagatcagttgggtgcacgagtgggttacatcgaactggatctcaacagcggtaagatccttgagagttttcgccccgaagaacgttttccaatgatgagcacttttaaagttctgctatgtggcgcggtattatcccgtattgacgccgggcaagagcaactcggtc…
3421		plasmid	pSAPI	pBluescript based SapI Golden Gate cloning vector	this study	gtggcacttttcggggaaatgtgcgcggaacccctatttgtttatttttctaaatacattcaaatatgtatccgctcatgagacaataaccctgataaatgcttcaataatattgaaaaaggaagagtatgagtattcaacatttccgtgtcgcccttattcccttttttgcggcattttgccttcctgtttttgctcacccagaaacgctggtgaaagtaaaagatgctgaagatcagttgggtgcacgagtgggttacatcgaactggatctcaacagcggtaagatccttgagagttttcgccccgaagaacgttttccaatgatgagcacttttaaagttctgctatgtggcgcggtattatcccgtattgacgccgggcaagagcaactcggtc…
3426	91824	plasmid	pDD372	GFP-C1 in an FP slot vector fo SAPTRAP GG cloning	Dickinson et al. 2018
3432	91829	plasmid	pDD363	loxP-flanked SEC donor for the SapTrap cloning system	Dickinson et al. 2018
3456		plasmid	DR274 NT- BsaI	A Golden Gate SapI GGT ACG assembly vector	this study	TGGGCCTTTCTTCGGTAGAAAATCAAAGGATCTTCttgagatcctttttttctgcgcgtaatctgctgcttgcaaacaaaaaaaccaccgctaccagcggtggtttgtttgccggatcaagagctaccaactctttttccgaggtaactggcttcagcagagcgcagataccaaatactgttcttctagtgtagccgtagttaggccaccacttcaagaactctgtagcaccgcctacatacctcgctctgctaatcctgttaccagtggctgctgccagtggcgataagtcgtgtcttaccgggttggactcaagacgatagttaccggataaggcgcagcggtcgggctgaacggggggttcgtgcacacagcccagcttggagcgaacgacctaca…
3467		plasmid	DR274 5'arm-BsaI	A Golden Gate SapI TGG GCG assembly vector	this study	TGGGCCTTTCTTCGGTAGAAAATCAAAGGATCTTCttgagatcctttttttctgcgcgtaatctgctgcttgcaaacaaaaaaaccaccgctaccagcggtggtttgtttgccggatcaagagctaccaactctttttccgaggtaactggcttcagcagagcgcagataccaaatactgttcttctagtgtagccgtagttaggccaccacttcaagaactctgtagcaccgcctacatacctcgctctgctaatcctgttaccagtggctgctgccagtggcgataagtcgtgtcttaccgggttggactcaagacgatagttaccggataaggcgcagcggtcgggctgaacggggggttcgtgcacacagcccagcttggagcgaacgacctaca…
3468		plasmid	DR274 CT-BsaI	A Golden Gate SapI GCG ATG assembly vector	this study	TGGGCCTTTCTTCGGTAGAAAATCAAAGGATCTTCttgagatcctttttttctgcgcgtaatctgctgcttgcaaacaaaaaaaccaccgctaccagcggtggtttgtttgccggatcaagagctaccaactctttttccgaggtaactggcttcagcagagcgcagataccaaatactgttcttctagtgtagccgtagttaggccaccacttcaagaactctgtagcaccgcctacatacctcgctctgctaatcctgttaccagtggctgctgccagtggcgataagtcgtgtcttaccgggttggactcaagacgatagttaccggataaggcgcagcggtcgggctgaacggggggttcgtgcacacagcccagcttggagcgaacgacctaca…
3469		plasmid	DR274 FP-BsaI	A Golden Gate SapI ATG AAG assembly vector	this study	TGGGCCTTTCTTCGGTAGAAAATCAAAGGATCTTCttgagatcctttttttctgcgcgtaatctgctgcttgcaaacaaaaaaaccaccgctaccagcggtggtttgtttgccggatcaagagctaccaactctttttccgaggtaactggcttcagcagagcgcagataccaaatactgttcttctagtgtagccgtagttaggccaccacttcaagaactctgtagcaccgcctacatacctcgctctgctaatcctgttaccagtggctgctgccagtggcgataagtcgtgtcttaccgggttggactcaagacgatagttaccggataaggcgcagcggtcgggctgaacggggggttcgtgcacacagcccagcttggagcgaacgacctaca…
3470		plasmid	DR274 3'arm-BsaI	A Golden Gate SapI ACG GTA assembly vector	this study	TGGGCCTTTCTTCGGTAGAAAATCAAAGGATCTTCttgagatcctttttttctgcgcgtaatctgctgcttgcaaacaaaaaaaccaccgctaccagcggtggtttgtttgccggatcaagagctaccaactctttttccgaggtaactggcttcagcagagcgcagataccaaatactgttcttctagtgtagccgtagttaggccaccacttcaagaactctgtagcaccgcctacatacctcgctctgctaatcctgttaccagtggctgctgccagtggcgataagtcgtgtcttaccgggttggactcaagacgatagttaccggataaggcgcagcggtcgggctgaacggggggttcgtgcacacagcccagcttggagcgaacgacctaca…
3591		plasmid	DR274 CT-NT-BsaI	A Golden Gate SapI GCG ACG assembly vector	this study	TGGGCCTTTCTTCGGTAGAAAATCAAAGGATCTTCttgagatcctttttttctgcgcgtaatctgctgcttgcaaacaaaaaaaccaccgctaccagcggtggtttgtttgccggatcaagagctaccaactctttttccgaggtaactggcttcagcagagcgcagataccaaatactgttcttctagtgtagccgtagttaggccaccacttcaagaactctgtagcaccgcctacatacctcgctctgctaatcctgttaccagtggctgctgccagtggcgataagtcgtgtcttaccgggttggactcaagacgatagttaccggataaggcgcagcggtcgggctgaacggggggttcgtgcacacagcccagcttggagcgaacgacctaca…
3610		synthetic fragment	syn Gal4 SK DB	synthetic codon optimized S. kuruvilia GAL4 DNA BD (aa 1 to 147 ) with N -terminal NLS and 1 intron	this study	GCTCTTCGGGTATGGGACCAAAGAAGAAGCGTAAGGCCTCCATGAAGCTCTTGTCCTCCATGGAGCAAGCCTGCGACATCTGCCGTCTCAAGAAACTCCGTTGCTCCAAGGAGAAGCCAAAGTGCGCCAAGTGCCTCAAGAACAACTCCGAGTGCCGTTACTCCCCAAAGGCCATGCGTTCCCCACTGACCCGTGCCCACCTCACCGAGGTCGAGTCCCGTCTCGAGAAGCTCGAAGACCTCTTCCTCCTCATGTTCCCACGTGAGAACCTGGACTCCATCCTCAACATGGACTCCCTCGACGAGGTCAAGgtaagtttaaacatatatatactaactaaccctgattatttaaattttcagGTCATGCTCAAGCAACTCTACATGCAAGACTACGGAG…
3611		synthetic fragment	syn QFAD2	synthetic codon optimized N. crassa QF activation domain (aa 602 to 816) with 1 intron	this study	GCTCTTCGGCGTCCCTCCTCGACTCCCTCCTCGCCCTCAAGgtaagtttaaacatatacatactaactaaccctgattatttaaattttcagAAGCAATCCCACTCCTCCGAGCGTCACCGTCGTCACCTCGAGGAGCTTTTCCCAGCCTACTCCTCCATCTGGCCACGTGGAGGCCGTCACTCCAACACCGGACTCCAACCAATCCGTCAACTTGAGCTCCCACCAACCGCCACCGCCACCGCCAGTATCATGCCACACGTCATGGAGCAACCACTCTCCACCTCCATCAACCCAGTCAACGACCGTTTCAACGGAATACCAAACCCAACCCCATACAACTCCGACGCCGCCCTCGACGCCATCACCCAAACCAACGACTACGGATCCGTCAACACCC…
3617		plasmid	pSAP mec-4p GAL4 VP64	mec-4 promoter driving GAL4-VP64	this study	TGGttccggagcagttcaagacaacttttgtcaatggcaagctagtcactgtcgtctcggacatttgctaaatcttctcacgtcataaccttatttttcaacttcatgaactatcccctcgaacttttttatttgtccctgtctacaattctttataagcaattgagacacactttgctttattaaataataccgattttgttttgtatatgcattgactggtgctcaactatttttattgaaaaaattactttttactgtctcgtcgaataaaagtgatcccttccaaaaaatagttattcatgtttgaaggtttgtgatcgtagaacaattgcaccgaatgtagtgtaaaaaaaattccagaatgttcaaatacatttccaccctcaccagaacatc…
3618		plasmid	pSAP mec-4p GAL4 QFAD	mec-4 promoter driving GAL4-QFAD	this study	gtggcacttttcggggaaatgtgcgcggaacccctatttgtttatttttctaaatacattcaaatatgtatccgctcatgagacaataaccctgataaatgcttcaataatattgaaaaaggaagagtatgagtattcaacatttccgtgtcgcccttattcccttttttgcggcattttgccttcctgtttttgctcacccagaaacgctggtgaaagtaaaagatgctgaagatcagttgggtgcacgagtgggttacatcgaactggatctcaacagcggtaagatccttgagagttttcgccccgaagaacgttttccaatgatgagcacttttaaagttctgctatgtggcgcggtattatcccgtattgacgccgggcaagagcaactcggtc…
3622		plasmid	pBluescript KS(+) FRT	pBluescript with an FRT site inserted into the polylinker	this study	gcacttttcggggaaatgtgcgcggaacccctatttgtttatttttctaaatacattcaaatatgtatccgctcatgagacaataaccctgataaatgcttcaataatattgaaaaaggaagagtatgagtattcaacatttccgtgtcgcccttattcccttttttgcggcattttgccttcctgtttttgctcacccagaaacgctggtgaaagtaaaagatgctgaagatcagttgggtgcacgagtgggttacatcgaactggatctcaacagcggtaagatccttgagagttttcgccccgaagaacgttttccaatgatgagcacttttaaagttctgctatgtggcgcggtattatcccgtattgacgccgggcaagagcaactcggtcgcc…
3623		plasmid	pBluescript KS(+) FRT3r	pBluescript with an FRT3 site inserted into the polylinker	this study	cacctaaattgtaagcgttaatattttgttaaaattcgcgttaaatttttgttaaatcagctcattttttaaccaataggccgaaatcggcaaaatcccttataaatcaaaagaatagaccgagatagggttgagtgttgttccagtttggaacaagagtccactattaaagaacgtggactccaacgtcaaagggcgaaaaaccgtctatcagggcgatggcccactacgtgaaccatcaccctaatcaagttttttggggtcgaggtgccgtaaagcactaaatcggaaccctaaagggagcccccgatttagagcttgacggggaaagccggcgaacgtggcgagaaaggaagggaagaaagcgaaaggagcgggcgctagggcgctggcaagtgt…
3625	122613	plasmid	TC358	tetO 7X ∆pes-10 GFP	Mao et al. 2019
3626	122614	plasmid	TC374	Prpl-28::rtetR-QFAD::P2A::mKate::T2A::tetR-pie1	Mao et al. 2019
3631		plasmid	II loxP FRT FRT3 targeting vector	loxP FRT FRT3 MosSci targeting vector for ttTi6505	this study	gtggcacttttcggggaaatgtgcgcggaacccctatttgtttatttttctaaatacattcaaatatgtatccgctcatgagacaataaccctgataaatgcttcaataatattgaaaaaggaagagtatgagtattcaacatttccgtgtcgcccttattcccttttttgcggcattttgccttcctgtttttgctcacccagaaacgctggtgaaagtaaaagatgctgaagatcagttgggtgcacgagtgggttacatcgaactggatctcaacagcggtaagatccttgagagttttcgccccgaagaacgttttccaatgatgagcacttttaaagttctgctatgtggcgcggtattatcccgtattgacgccgggcaagagcaactcggtc…
3632		plasmid	hygro sqt CRE FRT loxP vector	FRT hygR sqt-1 hs cre loxP vector for FLP and RMCE integration	this study	aaaaaggccgcgttgctggcgtttttccataggctccgcccccctgacgagcatcacaaaaatcgacgctcaagtcagaggtggcgaaacccgacaggactataaagataccaggcgtttccccctggaagctccctcgtgcgctctcctgttccgaccctgccgcttaccggatacctgtccgcctttctcccttcgggaagcgtggcgctttctcatagctcacgctgtaggtatctcagttcggtgtaggtcgttcgctccaagctgggctgtgtgcacgaaccccccgttcagcccgaccgctgcgccttatccggtaactatcgtcttgagtccaacccggtaagacacgacttatcgccactggcagcagccactggtaacaggattagcaga…
3638		plasmid	loxP MCS FRT3 FRT hygro Sqt Cre	loxP MCS FRT3 FRT hygR sqt-1 hs cre vector for RCME integration	this study	GAAGTTCCTATTCtctagaaaGTATAGGAACTTCATGAAAAAGCCTGAACTCACCGCGACGTCTGTCGAGAAGTTTCTGATCGAAAAGTTCGACAGCGTCTCCGACCTGATGCAGCTCTCGGAGGGCGAAGAATCTCGTGCTTTCAGCTTCGATGTAGGAGGGCGTGGATATGTCCTGCGGGTAAATAGCTGCGCCGATGGTTTCTACAAAGATCGTTATGTTTATCGGCACTTTGCATCGGCCGCGCTCCCGATTCCGGAAGTGCTTGACATTGGGGAATTCAGCGAGAGCCTGACCTATTGCATCTCCCGCCGTGCACAGGGTGTCACGTTGCAAGACCTGCCTGAAACCGAACTGCCCGCTGTTCTGCAGCCGGTCGCGGAGGCCATGGATGCGAT…
3643		plasmid	loxP sapI MCS FRT3 FRT hygro Sqt Cre	loxP SapI MCS FRT3 FRT hygR sqt-1 hs cre vector for RCME integration	this study	GAAGTTCCTATTCtctagaaaGTATAGGAACTTCATGAAAAAGCCTGAACTCACCGCGACGTCTGTCGAGAAGTTTCTGATCGAAAAGTTCGACAGCGTCTCCGACCTGATGCAGCTCTCGGAGGGCGAAGAATCTCGTGCTTTCAGCTTCGATGTAGGAGGGCGTGGATATGTCCTGCGGGTAAATAGCTGCGCCGATGGTTTCTACAAAGATCGTTATGTTTATCGGCACTTTGCATCGGCCGCGCTCCCGATTCCGGAAGTGCTTGACATTGGGGAATTCAGCGAGAGCCTGACCTATTGCATCTCCCGCCGTGCACAGGGTGTCACGTTGCAAGACCTGCCTGAAACCGAACTGCCCGCTGTTCTGCAGCCGGTCGCGGAGGCCATGGATGCGAT…
3649	154110	plasmid	pCFJ1272 FRT FRT3 landing	miniMos loxP rpl-28p FRT GFP-his-58 FRT3 landing vector	this study	GCACCGTACGTCTCGAGGAATTCTATCAGGTGTACAAGTATGAAATGTCGTTTCGAACATATAGATGTCTCGCAAACGTAAATATTTATCGATTGTCATAAAACTTTGACCTTGTGAAGTGTCAACCTTGACTGTCGAACCACCATAGTTTGGCGCGAATTGAGCGTCATAATTGTTTACTCTCAGTGCAGTCAACATGTCGAGTTTCGTGCCGAATAAAGAGCAAACGCGGACAGTATTAATTTTCTGTTTTCATTTGAAGAAAACAGCTGCGGccggatccaggaaacagctatgaccatgattacgccaagctatcaactttgtatagaaaagttgAGCTCCACCGCGGTGGCGGCCGCTCTAGAACTAGGctgtttcgAAGgtaagtttaaaATA…
3656		plasmid	pLF3FShC phat-5p Cherry V2A GFP-RAB-3	phat-5 promoter driving the biciston mcherry V2A peptide GFP-RAB-3 in an RCME vector	this study	GAAGTTCCTATTCtctagaaaGTATAGGAACTTCATGAAAAAGCCTGAACTCACCGCGACGTCTGTCGAGAAGTTTCTGATCGAAAAGTTCGACAGCGTCTCCGACCTGATGCAGCTCTCGGAGGGCGAAGAATCTCGTGCTTTCAGCTTCGATGTAGGAGGGCGTGGATATGTCCTGCGGGTAAATAGCTGCGCCGATGGTTTCTACAAAGATCGTTATGTTTATCGGCACTTTGCATCGGCCGCGCTCCCGATTCCGGAAGTGCTTGACATTGGGGAATTCAGCGAGAGCCTGACCTATTGCATCTCCCGCCGTGCACAGGGTGTCACGTTGCAAGACCTGCCTGAAACCGAACTGCCCGCTGTTCTGCAGCCGGTCGCGGAGGCCATGGATGCGAT…
3657		plasmid	pLF3FShC phat-5p Cherry V2A ANF-EMD	phat-5 promoter driving the biciston mcherry V2A peptide rat ANF-emerald fusion in an RCME vector	this study	GAAGTTCCTATTCtctagaaaGTATAGGAACTTCATGAAAAAGCCTGAACTCACCGCGACGTCTGTCGAGAAGTTTCTGATCGAAAAGTTCGACAGCGTCTCCGACCTGATGCAGCTCTCGGAGGGCGAAGAATCTCGTGCTTTCAGCTTCGATGTAGGAGGGCGTGGATATGTCCTGCGGGTAAATAGCTGCGCCGATGGTTTCTACAAAGATCGTTATGTTTATCGGCACTTTGCATCGGCCGCGCTCCCGATTCCGGAAGTGCTTGACATTGGGGAATTCAGCGAGAGCCTGACCTATTGCATCTCCCGCCGTGCACAGGGTGTCACGTTGCAAGACCTGCCTGAAACCGAACTGCCCGCTGTTCTGCAGCCGGTCGCGGAGGCCATGGATGCGAT…
3658		plasmid	pSAP scl-6-EMD	scl-6 promoter driving scl-6 Emerald	this study	gtggcacttttcggggaaatgtgcgcggaacccctatttgtttatttttctaaatacattcaaatatgtatccgctcatgagacaataaccctgataaatgcttcaataatattgaaaaaggaagagtatgagtattcaacatttccgtgtcgcccttattcccttttttgcggcattttgccttcctgtttttgctcacccagaaacgctggtgaaagtaaaagatgctgaagatcagttgggtgcacgagtgggttacatcgaactggatctcaacagcggtaagatccttgagagttttcgccccgaagaacgttttccaatgatgagcacttttaaagttctgctatgtggcgcggtattatcccgtattgacgccgggcaagagcaactcggtc…
3663		plasmid	pSAP lys-8 mCherry	lys-8 promoter driving lys-8 mCherry	this study	gtggcacttttcggggaaatgtgcgcggaacccctatttgtttatttttctaaatacattcaaatatgtatccgctcatgagacaataaccctgataaatgcttcaataatattgaaaaaggaagagtatgagtattcaacatttccgtgtcgcccttattcccttttttgcggcattttgccttcctgtttttgctcacccagaaacgctggtgaaagtaaaagatgctgaagatcagttgggtgcacgagtgggttacatcgaactggatctcaacagcggtaagatccttgagagttttcgccccgaagaacgttttccaatgatgagcacttttaaagttctgctatgtggcgcggtattatcccgtattgacgccgggcaagagcaactcggtc…
3666		plasmid	pCFJ1272 sqt cre Sap	miniMos vector with Both SapI sites for GG cloning and an SEC	this study	GCACCGTACGTCTCGAGGAATTCTATCAGGTGTACAAGTATGAAATGTCGTTTCGAACATATAGATGTCTCGCAAACGTAAATATTTATCGATTGTCATAAAACTTTGACCTTGTGAAGTGTCAACCTTGACTGTCGAACCACCATAGTTTGGCGCGAATTGAGCGTCATAATTGTTTACTCTCAGTGCAGTCAACATGTCGAGTTTCGTGCCGAATAAAGAGCAAACGCGGACAGTATTAATTTTCTGTTTTCATTTGAAGAAAACAGCTGCGGccggatccaggaaacagctatgaccatgattacgccaagctatcaactttgtatagaaaagttgAGCTCCACCGCGGTGGCGGCCGCTCTAGAACTAGGctgtttcgAAGgtaagtttaaaATA…
3671		plasmid	tetOp cherry V2A GFP-rab-3	tetO 7X reporter driving biciston mcherry V2A GFP-rab-3	this study	tcgcgcgtttcggtgatgacggtgaaaacctctgacacatgcagctcccggagacggtcacagcttgtctgtaagcggatgccgggagcagacaagcccgtcagggcgcgtcagcgggtgttggcgggtgtcggggctggcttaactatgcggcatcagagcagattgtactgagagtgcaccataccacagcttttcaattcaattcatcattttttttttattcttttttttgatttcggtttctttgaaatttttttgattcggtaatctccgaacagaaggaagaacgaaggaaggagcacagacttagattggtatatatacgcatatgtagtgttgaagaaacatgaaattgcccagtattcttaacccaactgcacagaacaaaaacctgca…
3672		plasmid	phat-5p rtetR-QFAD	phat-5 promoter driving tetR-QFAD P2A mKate T2A tetR-pie1	this study	TGTGGAATTGTGAGCGGATAACAATTTCACACAGGAAACAGCTATGACCATGATTACGCCAAGCTGTAAGTTTAAACATGATCTTACTAACTAACTATTCTCATTTAAATTTTCAGAGCTTAAAAATGGCTGAAATCACTCACAACGATGGATACGCTAACAACTTGGAAATGAAATAAGCTTGCATGCCTGCAGcaccctctcaacaccatcaatactattttcacaccacacaaggcgataaatcatcacatgctccgatattcattgtttccaacgcccgccaaactgatacagtttgcacctgttcaaattgtcgaaagatgaaatagttcacgagatggttagaaactgagacagtttcattgtattctaaaagagactaacagatgaatatta…
3673		plasmid	Y8a9a.2p rtetR-QFAD	Y8A9A.2 promoter driving tetR-QFAD P2A mKate T2A tetR-pie1	this study	TGTGGAATTGTGAGCGGATAACAATTTCACACAGGAAACAGCTATGACCATGATTACGCCAAGCTGTAAGTTTAAACATGATCTTACTAACTAACTATTCTCATTTAAATTTTCAGAGCTTAAAAATGGCTGAAATCACTCACAACGATGGATACGCTAACAACTTGGAAATGAAATAAGCTTGCATGCCTGCAggtcgacctgtacgtgttggtttagctgcatgtcgaaaaaaacgggtggttggcagcttgtcatattaaatcgacaagagtttcccgtcgtttgaccatttccacaagtttcacctcccggtgaacaccatttcctactttaatttatttctcatttttataatacatatatgtattcgaatcttttttatagggtacccccaga…
3674		plasmid	DR274 FP mCherry	mCherry in a Golden Gate SapI ATG AAG assembly vectory	this study	gATGGTTTCAAAGGGTGAAGAAGATAACATGGCAATTATTAAAGAGTTTATGCGTTTCAAGGTGCATATGGAGGGATCTGTCAATGGGCATGAGTTTGAAATTGAAGGTGAAGGAGAAGGCCGACCATATGAGGGAACACAAACCGCAAAACTAAAGgtaagtttaaacatatatatactaactaaccctgattatttaaattttcagGTAACTAAAGGCGGACCATTACCATTCGCCTGGGACATCCTCTCTCCACAGTTCATGTATGGAAGTAAAGCTTATGTTAAACATCCGGCAGATATACCAGATTATTTGAAACTTTCATTCCCGGAGGGTTTTAAGTGGGAACGCGTAATGAATTTTGAAGACGGAGGAGTTGTTACAGTGACGCAAGACTC…
3681		plasmid	pCFJ1272 Sqt Cre phat-5p rtetR-QFAD	phat-5p driving rtetR-QF P2A mKate T2A tetR-pieR in miniMos SEC vector	this study	ggtatcagctcactcaaaggcggtaatacggttatccacagaatcaggggataacgcaggaaagaacatgtgagcaaaaggccagcaaaagaccaggaaccgtaaaaaggccgcgttgctggcgtttttccataggctccgcccccctgacgagcatcacaaaaatcgacgctcaagtcagaggtggcgaaacccgacaggactataaagataccaggcgtttccccctggaagctccctcgtgcgctctcctgttccgaccctgccgcttaccggatacctgtccgcctttctcccttcgggaagcgtggcgctttctcatagctcacgctgtaggtatctcagttcggtgtaggtcgttcgctccaagctgggctgtgtgcacgaaccccccgttca…
3684		plasmid	pLF3FShC tetO 7X mCherry V2A GFP-RAB-3	tetO 7X reporter driving biciston mcherry V2A peptide GFP-RAB-3 fusion in an RCME vector	this study	GAAGTTCCTATTCtctagaaaGTATAGGAACTTCATGAAAAAGCCTGAACTCACCGCGACGTCTGTCGAGAAGTTTCTGATCGAAAAGTTCGACAGCGTCTCCGACCTGATGCAGCTCTCGGAGGGCGAAGAATCTCGTGCTTTCAGCTTCGATGTAGGAGGGCGTGGATATGTCCTGCGGGTAAATAGCTGCGCCGATGGTTTCTACAAAGATCGTTATGTTTATCGGCACTTTGCATCGGCCGCGCTCCCGATTCCGGAAGTGCTTGACATTGGGGAATTCAGCGAGAGCCTGACCTATTGCATCTCCCGCCGTGCACAGGGTGTCACGTTGCAAGACCTGCCTGAAACCGAACTGCCCGCTGTTCTGCAGCCGGTCGCGGAGGCCATGGATGCGAT…
3689	154111	plasmid	pCFJ1272 mex-5 FLP FRT FRT3 landing	miniMos loxP mex-5p FLP sl2 mNG rpl-28p FRT GFP-his-58 FRT landing vector	this study	GCACCGTACGTCTCGAGGAATTCTATCAGGTGTACAAGTATGAAATGTCGTTTCGAACATATAGATGTCTCGCAAACGTAAATATTTATCGATTGTCATAAAACTTTGACCTTGTGAAGTGTCAACCTTGACTGTCGAACCACCATAGTTTGGCGCGAATTGAGCGTCATAATTGTTTACTCTCAGTGCAGTCAACATGTCGAGTTTCGTGCCGAATAAAGAGCAAACGCGGACAGTATTAATTTTCTGTTTTCATTTGAAGAAAACAGCTGCGGccggatccaggaaacagctatgaccatgattacgccaagctatcaactttgtatagaaaagttgAGCTCCACCGCGGTGGCGGCCGCTCTAGAACTAGGctgtttcgAAGgtaagtttaaaATA…
3693		plasmid	pLF3FShC rab-3p CaTevP	long rab-3 promoter a calcium activated Tev Protease in an RMCE vector	this study	GAAGTTCCTATTCtctagaaaGTATAGGAACTTCATGAAAAAGCCTGAACTCACCGCGACGTCTGTCGAGAAGTTTCTGATCGAAAAGTTCGACAGCGTCTCCGACCTGATGCAGCTCTCGGAGGGCGAAGAATCTCGTGCTTTCAGCTTCGATGTAGGAGGGCGTGGATATGTCCTGCGGGTAAATAGCTGCGCCGATGGTTTCTACAAAGATCGTTATGTTTATCGGCACTTTGCATCGGCCGCGCTCCCGATTCCGGAAGTGCTTGACATTGGGGAATTCAGCGAGAGCCTGACCTATTGCATCTCCCGCCGTGCACAGGGTGTCACGTTGCAAGACCTGCCTGAAACCGAACTGCCCGCTGTTCTGCAGCCGGTCGCGGAGGCCATGGATGCGAT…
3694		plasmid	DR274 AAG GTA tbb-2 3'UTR	tbb-2 3'UTR in a Golde Gate SapI AAG GTA assembly vector	this study	TGGGCCTTTCTTCGGTAGAAAATCAAAGGATCTTCttgagatcctttttttctgcgcgtaatctgctgcttgcaaacaaaaaaaccaccgctaccagcggtggtttgtttgccggatcaagagctaccaactctttttccgaggtaactggcttcagcagagcgcagataccaaatactgttcttctagtgtagccgtagttaggccaccacttcaagaactctgtagcaccgcctacatacctcgctctgctaatcctgttaccagtggctgctgccagtggcgataagtcgtgtcttaccgggttggactcaagacgatagttaccggataaggcgcagcggtcgggctgaacggggggttcgtgcacacagcccagcttggagcgaacgacctaca…
3695		plasmid	DR274 TGG ATG tetO 7X ∆pes-10	tetO 7X ∆pes-10 promoter in a Golde Gate SapI TGG ATG assembly vector	this study	TGGGCCTTTCTTCGGTAGAAAATCAAAGGATCTTCttgagatcctttttttctgcgcgtaatctgctgcttgcaaacaaaaaaaccaccgctaccagcggtggtttgtttgccggatcaagagctaccaactctttttccgaggtaactggcttcagcagagcgcagataccaaatactgttcttctagtgtagccgtagttaggccaccacttcaagaactctgtagcaccgcctacatacctcgctctgctaatcctgttaccagtggctgctgccagtggcgataagtcgtgtcttaccgggttggactcaagacgatagttaccggataaggcgcagcggtcgggctgaacggggggttcgtgcacacagcccagcttggagcgaacgacctaca…
3696		plasmid	DR274 CT-NT mcs	A Golden Gate SapI GCG ACG assembly vector	this study	TGGGCCTTTCTTCGGTAGAAAATCAAAGGATCTTCttgagatcctttttttctgcgcgtaatctgctgcttgcaaacaaaaaaaccaccgctaccagcggtggtttgtttgccggatcaagagctaccaactctttttccgaggtaactggcttcagcagagcgcagataccaaatactgttcttctagtgtagccgtagttaggccaccacttcaagaactctgtagcaccgcctacatacctcgctctgctaatcctgttaccagtggctgctgccagtggcgataagtcgtgtcttaccgggttggactcaagacgatagttaccggataaggcgcagcggtcgggctgaacggggggttcgtgcacacagcccagcttggagcgaacgacctaca…
3697		plasmid	DR274 GGT GCG - BsaI	A Golden Gate SapI GGT GCG assembly vector	this study	AATTCGCTCTTCgGGTAGAGACCgcaatGGATCCaaccattGGTCTCAGCGAGAAGAGCAAGCTTGGATCGACGAGAGCAGCGCGACTGGATCTGTCGCCCGTCTCAAACGCAACCCTCCGGCGGTCGCATATCATTCAGGACGAGCCTCAGACTCCAGCGTAACTGGACTGCAATCAACTCACTGGCTCACCTTCCGGTCCACGATCAGCTAGAATCAAGCTGACTAGATAAACTGGCCGTCGTTTTACACGGGTGGGCCTTTCTTCGGTAGAAAATCAAAGGATCTTCttgagatcctttttttctgcgcgtaatctgctgcttgcaaacaaaaaaaccaccgctaccagcggtggtttgtttgccggatcaagagctaccaactctttttccgagg…
3698		plasmid	DR274 5'arm -CT- BsaI	A Golden Gate SapI TGG ATG assembly vector	this study	gttggaacctcttacgtgccGATCAAGTCAAAAGCCTCCGGTCGGAGGCTTTTGACTTTCTGCTATGGAGGTCAGGTATGATTTttGAATTCGCTCTTCgTGGAGAGACCgcaatGGATCCaaccattGGTCTCAATGaGAAGAGCAAGCTTGGATCGACGAGAGCAGCGCGACTGGATCTGTCGCCCGTCTCAAACGCAACCCTCCGGCGGTCGCATATCATTCAGGACGAGCCTCAGACTCCAGCGTAACTGGACTGCAATCAACTCACTGGCTCACCTTCCGGTCCACGATCAGCTAGAATCAAGCTGACTAGATAAACTGGCCGTCGTTTTACACGGGTGGGCCTTTCTTCGGTAGAAAATCAAAGGATCTTCttgagatcctttttttctgcgc…
3700		plasmid	DR274 5' arm 11X UAS	UAS 11X 'enhancer' in a Golden Gate SapI TGG GCG assembly vector	this study	TGGGCCTTTCTTCGGTAGAAAATCAAAGGATCTTCttgagatcctttttttctgcgcgtaatctgctgcttgcaaacaaaaaaaccaccgctaccagcggtggtttgtttgccggatcaagagctaccaactctttttccgaggtaactggcttcagcagagcgcagataccaaatactgttcttctagtgtagccgtagttaggccaccacttcaagaactctgtagcaccgcctacatacctcgctctgctaatcctgttaccagtggctgctgccagtggcgataagtcgtgtcttaccgggttggactcaagacgatagttaccggataaggcgcagcggtcgggctgaacggggggttcgtgcacacagcccagcttggagcgaacgacctaca…
3701		plasmid	DR274 TGG GTT - BsaI	A Golden Gate SapI TGG GTT assembly vector	this study	TGGGCCTTTCTTCGGTAGAAAATCAAAGGATCTTCttgagatcctttttttctgcgcgtaatctgctgcttgcaaacaaaaaaaccaccgctaccagcggtggtttgtttgccggatcaagagctaccaactctttttccgaggtaactggcttcagcagagcgcagataccaaatactgttcttctagtgtagccgtagttaggccaccacttcaagaactctgtagcaccgcctacatacctcgctctgctaatcctgttaccagtggctgctgccagtggcgataagtcgtgtcttaccgggttggactcaagacgatagttaccggataaggcgcagcggtcgggctgaacggggggttcgtgcacacagcccagcttggagcgaacgacctaca…
3702		plasmid	DR274 AAG GTA - BsaI	A Golden Gate SapI AAG GTA assembly vector	this study	TGGGCCTTTCTTCGGTAGAAAATCAAAGGATCTTCttgagatcctttttttctgcgcgtaatctgctgcttgcaaacaaaaaaaccaccgctaccagcggtggtttgtttgccggatcaagagctaccaactctttttccgaggtaactggcttcagcagagcgcagataccaaatactgttcttctagtgtagccgtagttaggccaccacttcaagaactctgtagcaccgcctacatacctcgctctgctaatcctgttaccagtggctgctgccagtggcgataagtcgtgtcttaccgggttggactcaagacgatagttaccggataaggcgcagcggtcgggctgaacggggggttcgtgcacacagcccagcttggagcgaacgacctaca…
3703		plasmid	DR274 5' arm lexO 5X	lexO 5X 'enhancer' in a Golden Gate SapI TGG GCG assembly vector	this study	TGGGCCTTTCTTCGGTAGAAAATCAAAGGATCTTCttgagatcctttttttctgcgcgtaatctgctgcttgcaaacaaaaaaaccaccgctaccagcggtggtttgtttgccggatcaagagctaccaactctttttccgaggtaactggcttcagcagagcgcagataccaaatactgttcttctagtgtagccgtagttaggccaccacttcaagaactctgtagcaccgcctacatacctcgctctgctaatcctgttaccagtggctgctgccagtggcgataagtcgtgtcttaccgggttggactcaagacgatagttaccggataaggcgcagcggtcgggctgaacggggggttcgtgcacacagcccagcttggagcgaacgacctaca…
3704		plasmid	DR274 5' arm QUAS 5X	QUAS 5X 'enhancer' in a Golden Gate SapI TGG GCG assembly vector	this study	TGGGCCTTTCTTCGGTAGAAAATCAAAGGATCTTCttgagatcctttttttctgcgcgtaatctgctgcttgcaaacaaaaaaaccaccgctaccagcggtggtttgtttgccggatcaagagctaccaactctttttccgaggtaactggcttcagcagagcgcagataccaaatactgttcttctagtgtagccgtagttaggccaccacttcaagaactctgtagcaccgcctacatacctcgctctgctaatcctgttaccagtggctgctgccagtggcgataagtcgtgtcttaccgggttggactcaagacgatagttaccggataaggcgcagcggtcgggctgaacggggggttcgtgcacacagcccagcttggagcgaacgacctaca…
3706		plasmid	DR274 CT ∆pes-10	∆pes-10 basal promoter in a Golden Gate SapI GCG ATG assembly vector	this study	ggcgtgatcgattttttgcaaattacgagcgttgtagggggcggagcgataggtcctataggttttggtatatcatcattcattcattcattggtacattcatttacccaccttcctctttctgagcttctctggagttctgtgcttcctttttcccttatctttatactgtaatttttaactttcagccggtagaaaaATGaGAAGAGCAAGCTTGGATCGACGAGAGCAGCGCGACTGGATCTGTCGCCCGTCTCAAACGCAACCCTCCGGCGGTCGCATATCATTCAGGACGAGCCTCAGACTCCAGCGTAACTGGACTGCAATCAACTCACTGGCTCACCTTCCGGTCCACGATCAGCTAGAATCAAGCTGACTAGATAAACTGGCCGTCGTTTT…
3708		plasmid	pLAOF3FShC	An RMCE integration vector in which the vector is also integrated	this study	gtacactacttttccatgtaccgaatgtgagtcgccctccttttgcaacaagcagctcgaatgttctagaaaaaggtggaaaatagtataaataccgttgaaaataaataccgaacaacatttgctctaattgtgaaattagaaatcttcaaactataatcatgtcactttaccactatttccgtccagctcaacgttccgtttttggtgatcGTAagcttatcgataccgTCGACATAACTTCGTATAGCATACATTATACGAAGTTATtacgcgcgctcactggccgtcgttttacaacgtcgtgactgggaaaaccctggcgttacccaacttaatcgccttgcagcacatccccctttcgccagctggcgtaatagcgaagaggcccgcaccgat…
3709		plasmid	DR274 CT-NT mex-5 landing Mos	precursor to 3721 DR274 mex-5 landing clone	this study	TGGGCCTTTCTTCGGTAGAAAATCAAAGGATCTTCttgagatcctttttttctgcgcgtaatctgctgcttgcaaacaaaaaaaccaccgctaccagcggtggtttgtttgccggatcaagagctaccaactctttttccgaggtaactggcttcagcagagcgcagataccaaatactgttcttctagtgtagccgtagttaggccaccacttcaagaactctgtagcaccgcctacatacctcgctctgctaatcctgttaccagtggctgctgccagtggcgataagtcgtgtcttaccgggttggactcaagacgatagttaccggataaggcgcagcggtcgggctgaacggggggttcgtgcacacagcccagcttggagcgaacgacctaca…
3710		plasmid	D274 GGT GCG gal4 SK DB	synthetic codon optimized S. kuruvilia GAL4 DNA binding domain in a SapI GGT GCG assembly vector	this study	AATTCGCTCTTCgGGTATGGGACCAAAGAAGAAGCGTAAGGCCTCCATGAAGCTCTTGTCCTCCATGGAGCAAGCCTGCGACATCTGCCGTCTCAAGAAACTCCGTTGCTCCAAGGAGAAGCCAAAGTGCGCCAAGTGCCTCAAGAACAACTCCGAGTGCCGTTACTCCCCAAAGGCCATGCGTTCCCCACTGACCCGTGCCCACCTCACCGAGGTCGAGTCCCGTCTCGAGAAGCTCGAAGACCTCTTCCTCCTCATGTTCCCACGTGAGAACCTGGACTCCATCCTCAACATGGACTCCCTCGACGAGGTCAAGgtaagtttaaacatatatatactaactaaccctgattatttaaattttcagGTCATGCTCAAGCAACTCTACATGCAAGACTA…
3711		plasmid	D274 GGT GCG QF DB	QF DNA binding domain in a Golden Gate SapI GGT GCG assembly vector	this study	TGGGCCTTTCTTCGGTAGAAAATCAAAGGATCTTCttgagatcctttttttctgcgcgtaatctgctgcttgcaaacaaaaaaaccaccgctaccagcggtggtttgtttgccggatcaagagctaccaactctttttccgaggtaactggcttcagcagagcgcagataccaaatactgttcttctagtgtagccgtagttaggccaccacttcaagaactctgtagcaccgcctacatacctcgctctgctaatcctgttaccagtggctgctgccagtggcgataagtcgtgtcttaccgggttggactcaagacgatagttaccggataaggcgcagcggtcgggctgaacggggggttcgtgcacacagcccagcttggagcgaacgacctaca…
3713		plasmid	pLF3FShC Y8A9A.2p rtetR-QFAD	Y8A9A.2 promoter driving rtetR-QFAD P2A mKate T2A tetR-pie1 in an RMCE vector	this study	GAAGTTCCTATTCtctagaaaGTATAGGAACTTCATGAAAAAGCCTGAACTCACCGCGACGTCTGTCGAGAAGTTTCTGATCGAAAAGTTCGACAGCGTCTCCGACCTGATGCAGCTCTCGGAGGGCGAAGAATCTCGTGCTTTCAGCTTCGATGTAGGAGGGCGTGGATATGTCCTGCGGGTAAATAGCTGCGCCGATGGTTTCTACAAAGATCGTTATGTTTATCGGCACTTTGCATCGGCCGCGCTCCCGATTCCGGAAGTGCTTGACATTGGGGAATTCAGCGAGAGCCTGACCTATTGCATCTCCCGCCGTGCACAGGGTGTCACGTTGCAAGACCTGCCTGAAACCGAACTGCCCGCTGTTCTGCAGCCGGTCGCGGAGGCCATGGATGCGAT…
3714		synthetic fragment	tetR	synthetic tetR (tTA DNA binding domain a.a. 1 to 207) with 1 intron	this study	AAGCTCTTCGGGTATGTCCCGTCTGGACAAGTCCAAGGTCATCAACTCCGCCCTCGAGCTCCTCAATGAGGTCGGAATTGAGGGACTCACCACCCGTAAGCTCGCCCAAAAGCTCGGAGTTGAGCAACCAACCCTCTACTGGCACGTCAAGAACAAGCGTGCACTTCTCGACGCCCTCGCCATCGAGATGCTCGATCGTCACCACACCCACTTCTGCCCACTCGAGGGAGAATCCTGGCAAGATTTCCTCCGTAACAACGCCAAGTCCTTCCGTTGCGCCCTTCTCTCCCACCGTGACGGAGCCAAGgtaagtttaaacatatatatactaactaaccctgattatttaaattttcagGTCCATCTCGGAACCCGTCCAACCGAGAAGCAATACGAGAC…
3715		synthetic fragment	lexA	synthetic lexA DNA binding domain (a.a. 1 to 202) with N-terminal SV40 NLS and 2 exons	this study	aagctcttcgggtATGCCACCAAAGAAGAAGCGTAAGGTCGAGGACCCAATGAAGGCCCTCACCGCCCGTCAACAAGAGGTCTTCGACCTCATCCGTGACCACATCTCCCAAACCGGAATGCCACCAACCCGTGCCGAGATCGCCCAACGTCTCGGATTCCGTTCCCCAAACGCCGCCGAGGAGCACCTCAAGgtaagtttaaacatatatatactaactaaccctgattatttaaattttcagGCTCTCGCTCGTAAGGGAGTCATCGAGATCGTCTCCGGAGCCTCCCGTGGAATCCGTCTCCTCCAAGAGGAGGAGGAGGGACTCCCACTCGTCGGACGTGTCGCTGCTGGAGAGCCACTCCTCGCCCAACAACACATCGAGGGACACTACCAAGT…
3718		plasmid	D274 GGT GCG tetR	synthetic codon optimized tetR (tTA DNA binding domain) in a SapI GGT GCG assembly vector	this study	AATTCGCTCTTCgGGTATGTCCCGTCTGGACAAGTCCAAGGTCATCAACTCCGCCCTCGAGCTCCTCAATGAGGTCGGAATTGAGGGACTCACCACCCGTAAGCTCGCCCAAAAGCTCGGAGTTGAGCAACCAACCCTCTACTGGCACGTCAAGAACAAGCGTGCACTTCTCGACGCCCTCGCCATCGAGATGCTCGATCGTCACCACACCCACTTCTGCCCACTCGAGGGAGAATCCTGGCAAGATTTCCTCCGTAACAACGCCAAGTCCTTCCGTTGCGCCCTTCTCTCCCACCGTGACGGAGCCAAGgtaagtttaaacatatatatactaactaaccctgattatttaaattttcagGTCCATCTCGGAACCCGTCCAACCGAGAAGCAATACGA…
3721		plasmid	DR274 CT-NT mex-5 RCME landing	loxP mex-5 FLP FRT FRT3 landing in a Golden Gate SapI GCG ACG assembly vector	this study	TGGGCCTTTCTTCGGTAGAAAATCAAAGGATCTTCttgagatcctttttttctgcgcgtaatctgctgcttgcaaacaaaaaaaccaccgctaccagcggtggtttgtttgccggatcaagagctaccaactctttttccgaggtaactggcttcagcagagcgcagataccaaatactgttcttctagtgtagccgtagttaggccaccacttcaagaactctgtagcaccgcctacatacctcgctctgctaatcctgttaccagtggctgctgccagtggcgataagtcgtgtcttaccgggttggactcaagacgatagttaccggataaggcgcagcggtcgggctgaacggggggttcgtgcacacagcccagcttggagcgaacgacctaca…
3722		plasmid	D274 GGT GCG lexA DB	synthetic codon optimized lexA DNA binding domain in a SapI GGT GCG assembly vector	this study	AATTCGCTCTTCgGGTATGCCACCAAAGAAGAAGCGTAAGGTCGAGGACCCAATGAAGGCCCTCACCGCCCGTCAACAAGAGGTCTTCGACCTCATCCGTGACCACATCTCCCAAACCGGAATGCCACCAACCCGTGCCGAGATCGCCCAACGTCTCGGATTCCGTTCCCCAAACGCCGCCGAGGAGCACCTCAAGgtaagtttaaacatatatatactaactaaccctgattatttaaattttcagGCTCTCGCTCGTAAGGGAGTCATCGAGATCGTCTCCGGAGCCTCCCGTGGAATCCGTCTCCTCCAAGAGGAGGAGGAGGGACTCCCACTCGTCGGACGTGTCGCTGCTGGAGAGCCACTCCTCGCCCAACAACACATCGAGGGACACTACCA…
3724	154112	plasmid	pLFF3SHC tetO 7X ∆pes-10 GFP-C1	tetO 7X ∆pes-10 promoter driving GFP-C1 in an RCME vector	this study	GAAGTTCCTATTCtctagaaaGTATAGGAACTTCATGAAAAAGCCTGAACTCACCGCGACGTCTGTCGAGAAGTTTCTGATCGAAAAGTTCGACAGCGTCTCCGACCTGATGCAGCTCTCGGAGGGCGAAGAATCTCGTGCTTTCAGCTTCGATGTAGGAGGGCGTGGATATGTCCTGCGGGTAAATAGCTGCGCCGATGGTTTCTACAAAGATCGTTATGTTTATCGGCACTTTGCATCGGCCGCGCTCCCGATTCCGGAAGTGCTTGACATTGGGGAATTCAGCGAGAGCCTGACCTATTGCATCTCCCGCCGTGCACAGGGTGTCACGTTGCAAGACCTGCCTGAAACCGAACTGCCCGCTGTTCTGCAGCCGGTCGCGGAGGCCATGGATGCGAT…
3725	154113	plasmid	pLF3FShC UAS 11X ∆pes-10 GFP-C1	UAS 11X ∆pes-10 promoter driving GFP-C1 in an RCME vector	this study	GAAGTTCCTATTCtctagaaaGTATAGGAACTTCATGAAAAAGCCTGAACTCACCGCGACGTCTGTCGAGAAGTTTCTGATCGAAAAGTTCGACAGCGTCTCCGACCTGATGCAGCTCTCGGAGGGCGAAGAATCTCGTGCTTTCAGCTTCGATGTAGGAGGGCGTGGATATGTCCTGCGGGTAAATAGCTGCGCCGATGGTTTCTACAAAGATCGTTATGTTTATCGGCACTTTGCATCGGCCGCGCTCCCGATTCCGGAAGTGCTTGACATTGGGGAATTCAGCGAGAGCCTGACCTATTGCATCTCCCGCCGTGCACAGGGTGTCACGTTGCAAGACCTGCCTGAAACCGAACTGCCCGCTGTTCTGCAGCCGGTCGCGGAGGCCATGGATGCGAT…
3726	154114	plasmid	pLF3FShC QUAS 5X ∆pes-10 GFP-C1	QUAS 5X ∆pes-10 promoter driving GFP-C1 in an RCME vector	this study	GAAGTTCCTATTCtctagaaaGTATAGGAACTTCATGAAAAAGCCTGAACTCACCGCGACGTCTGTCGAGAAGTTTCTGATCGAAAAGTTCGACAGCGTCTCCGACCTGATGCAGCTCTCGGAGGGCGAAGAATCTCGTGCTTTCAGCTTCGATGTAGGAGGGCGTGGATATGTCCTGCGGGTAAATAGCTGCGCCGATGGTTTCTACAAAGATCGTTATGTTTATCGGCACTTTGCATCGGCCGCGCTCCCGATTCCGGAAGTGCTTGACATTGGGGAATTCAGCGAGAGCCTGACCTATTGCATCTCCCGCCGTGCACAGGGTGTCACGTTGCAAGACCTGCCTGAAACCGAACTGCCCGCTGTTCTGCAGCCGGTCGCGGAGGCCATGGATGCGAT…
3727	154115	plasmid	pLF3FShC lexO 5X ∆pes-10 GFP-C1	lexO 5X ∆pes-10 promoter driving GFP-C1 in an RCME vector	this study	GAAGTTCCTATTCtctagaaaGTATAGGAACTTCATGAAAAAGCCTGAACTCACCGCGACGTCTGTCGAGAAGTTTCTGATCGAAAAGTTCGACAGCGTCTCCGACCTGATGCAGCTCTCGGAGGGCGAAGAATCTCGTGCTTTCAGCTTCGATGTAGGAGGGCGTGGATATGTCCTGCGGGTAAATAGCTGCGCCGATGGTTTCTACAAAGATCGTTATGTTTATCGGCACTTTGCATCGGCCGCGCTCCCGATTCCGGAAGTGCTTGACATTGGGGAATTCAGCGAGAGCCTGACCTATTGCATCTCCCGCCGTGCACAGGGTGTCACGTTGCAAGACCTGCCTGAAACCGAACTGCCCGCTGTTCTGCAGCCGGTCGCGGAGGCCATGGATGCGAT…
3728		plasmid	DR274 3' arm tbb-2 3'UTR	tbb-2 3' UTR in a Golden Gate SapI ACG GTA assembly vector	this study	TGGGCCTTTCTTCGGTAGAAAATCAAAGGATCTTCttgagatcctttttttctgcgcgtaatctgctgcttgcaaacaaaaaaaccaccgctaccagcggtggtttgtttgccggatcaagagctaccaactctttttccgaggtaactggcttcagcagagcgcagataccaaatactgttcttctagtgtagccgtagttaggccaccacttcaagaactctgtagcaccgcctacatacctcgctctgctaatcctgttaccagtggctgctgccagtggcgataagtcgtgtcttaccgggttggactcaagacgatagttaccggataaggcgcagcggtcgggctgaacggggggttcgtgcacacagcccagcttggagcgaacgacctaca…
3729		plasmid	pLF3FShC mec-4p lexA-QFAD	mec-4 promoter driving lexA-QFAD in an RCME vector	this study	GAAGTTCCTATTCtctagaaaGTATAGGAACTTCATGAAAAAGCCTGAACTCACCGCGACGTCTGTCGAGAAGTTTCTGATCGAAAAGTTCGACAGCGTCTCCGACCTGATGCAGCTCTCGGAGGGCGAAGAATCTCGTGCTTTCAGCTTCGATGTAGGAGGGCGTGGATATGTCCTGCGGGTAAATAGCTGCGCCGATGGTTTCTACAAAGATCGTTATGTTTATCGGCACTTTGCATCGGCCGCGCTCCCGATTCCGGAAGTGCTTGACATTGGGGAATTCAGCGAGAGCCTGACCTATTGCATCTCCCGCCGTGCACAGGGTGTCACGTTGCAAGACCTGCCTGAAACCGAACTGCCCGCTGTTCTGCAGCCGGTCGCGGAGGCCATGGATGCGAT…
3730		plasmid	pLF3FShC mec-4p tetR-QFAD	mec-4 promoter driving tetR-QFAD in an RCME vector	this study	cacctaaattgtaagcgttaatattttgttaaaattcgcgttaaatttttgttaaatcagctcattttttaaccaataggccgaaatcggcaaaatcccttataaatcaaaagaatagaccgagatagggttgagtgttgttccagtttggaacaagagtccactattaaagaacgtggactccaacgtcaaagggcgaaaaaccgtctatcagggcgatggcccactacgtgaaccatcaccctaatcaagttttttggggtcgaggtgccgtaaagcactaaatcggaaccctaaagggagcccccgatttagagcttgacggggaaagccggcgaacgtggcgagaaaggaagggaagaaagcgaaaggagcgggcgctagggcgctggcaagtgt…
3731		plasmid	pLF3FShC mec-4p QF	mec-4 promoter driving QF in an RCME vector	this study	GAAGTTCCTATTCtctagaaaGTATAGGAACTTCATGAAAAAGCCTGAACTCACCGCGACGTCTGTCGAGAAGTTTCTGATCGAAAAGTTCGACAGCGTCTCCGACCTGATGCAGCTCTCGGAGGGCGAAGAATCTCGTGCTTTCAGCTTCGATGTAGGAGGGCGTGGATATGTCCTGCGGGTAAATAGCTGCGCCGATGGTTTCTACAAAGATCGTTATGTTTATCGGCACTTTGCATCGGCCGCGCTCCCGATTCCGGAAGTGCTTGACATTGGGGAATTCAGCGAGAGCCTGACCTATTGCATCTCCCGCCGTGCACAGGGTGTCACGTTGCAAGACCTGCCTGAAACCGAACTGCCCGCTGTTCTGCAGCCGGTCGCGGAGGCCATGGATGCGAT…
3732	153086	plasmid	pLF3FShC mec-4p GFP-C1	mec-4 promoter driving GFP-C1 in an RCME vector	this study	GAAGTTCCTATTCtctagaaaGTATAGGAACTTCATGAAAAAGCCTGAACTCACCGCGACGTCTGTCGAGAAGTTTCTGATCGAAAAGTTCGACAGCGTCTCCGACCTGATGCAGCTCTCGGAGGGCGAAGAATCTCGTGCTTTCAGCTTCGATGTAGGAGGGCGTGGATATGTCCTGCGGGTAAATAGCTGCGCCGATGGTTTCTACAAAGATCGTTATGTTTATCGGCACTTTGCATCGGCCGCGCTCCCGATTCCGGAAGTGCTTGACATTGGGGAATTCAGCGAGAGCCTGACCTATTGCATCTCCCGCCGTGCACAGGGTGTCACGTTGCAAGACCTGCCTGAAACCGAACTGCCCGCTGTTCTGCAGCCGGTCGCGGAGGCCATGGATGCGAT…
3733		plasmid	pLF3FShC mec-4 GAL-4 VP64	mec-4 promoter driving GAL4-VP64 in an RCME vector	this study	GAAGTTCCTATTCtctagaaaGTATAGGAACTTCATGAAAAAGCCTGAACTCACCGCGACGTCTGTCGAGAAGTTTCTGATCGAAAAGTTCGACAGCGTCTCCGACCTGATGCAGCTCTCGGAGGGCGAAGAATCTCGTGCTTTCAGCTTCGATGTAGGAGGGCGTGGATATGTCCTGCGGGTAAATAGCTGCGCCGATGGTTTCTACAAAGATCGTTATGTTTATCGGCACTTTGCATCGGCCGCGCTCCCGATTCCGGAAGTGCTTGACATTGGGGAATTCAGCGAGAGCCTGACCTATTGCATCTCCCGCCGTGCACAGGGTGTCACGTTGCAAGACCTGCCTGAAACCGAACTGCCCGCTGTTCTGCAGCCGGTCGCGGAGGCCATGGATGCGAT…
3734	154118	plasmid	pLF3FShC mec-4p GAL-4 QFAD	mec-4 promoter driving GAL4-QFAD in an RCME vector	this study	GAAGTTCCTATTCtctagaaaGTATAGGAACTTCATGAAAAAGCCTGAACTCACCGCGACGTCTGTCGAGAAGTTTCTGATCGAAAAGTTCGACAGCGTCTCCGACCTGATGCAGCTCTCGGAGGGCGAAGAATCTCGTGCTTTCAGCTTCGATGTAGGAGGGCGTGGATATGTCCTGCGGGTAAATAGCTGCGCCGATGGTTTCTACAAAGATCGTTATGTTTATCGGCACTTTGCATCGGCCGCGCTCCCGATTCCGGAAGTGCTTGACATTGGGGAATTCAGCGAGAGCCTGACCTATTGCATCTCCCGCCGTGCACAGGGTGTCACGTTGCAAGACCTGCCTGAAACCGAACTGCCCGCTGTTCTGCAGCCGGTCGCGGAGGCCATGGATGCGAT…
3735		plasmid	DR274 5' arm-CT mec-4p	mec-4 promoter in a Goleden Gate SapI TGG ATG assembly vector	this study	gttggaacctcttacgtgccGATCAAGTCAAAAGCCTCCGGTCGGAGGCTTTTGACTTTCTGCTATGGAGGTCAGGTATGATTTttGAATTCGCTCTTCgTGGttccggagcagttcaagacaacttttgtcaatggcaagctagtcactgtcgtctcggacatttgctaaatcttctcacgtcataaccttatttttcaacttcatgaactatcccctcgaacttttttatttgtccctgtctacaattctttataagcaattgagacacactttgctttattaaataataccgattttgttttgtatatgcattgactggtgctcaactatttttattgaaaaaattactttttactgtctcgtcgaataaaagtgatcccttccaaaaaatagtta…
3736		plasmid	DR274 TGG GGT mec-4p	mec-4 promoter in a Golden Gate SapI TGG GGT assembly vector	this study	TGGGCCTTTCTTCGGTAGAAAATCAAAGGATCTTCttgagatcctttttttctgcgcgtaatctgctgcttgcaaacaaaaaaaccaccgctaccagcggtggtttgtttgccggatcaagagctaccaactctttttccgaggtaactggcttcagcagagcgcagataccaaatactgttcttctagtgtagccgtagttaggccaccacttcaagaactctgtagcaccgcctacatacctcgctctgctaatcctgttaccagtggctgctgccagtggcgataagtcgtgtcttaccgggttggactcaagacgatagttaccggataaggcgcagcggtcgggctgaacggggggttcgtgcacacagcccagcttggagcgaacgacctaca…
3738		plasmid	DR274 GGT GCG rtetR	rtetR (rtTA DNA binding domain) in a Golden Gate SapI GGT GCG assembly vector	this study	ACTGGCCGTCGTTTTACACGGGTGGGCCTTTCTTCGGTAGAAAATCAAAGGATCTTCttgagatcctttttttctgcgcgtaatctgctgcttgcaaacaaaaaaaccaccgctaccagcggtggtttgtttgccggatcaagagctaccaactctttttccgaggtaactggcttcagcagagcgcagataccaaatactgttcttctagtgtagccgtagttaggccaccacttcaagaactctgtagcaccgcctacatacctcgctctgctaatcctgttaccagtggctgctgccagtggcgataagtcgtgtcttaccgggttggactcaagacgatagttaccggataaggcgcagcggtcgggctgaacggggggttcgtgcacacagccc…
3740		plasmid	DR274 GCG ACG QFAD	QF activation domain in a Golden Gate SapI GCG ACG assembly vector	this study	TGGGCCTTTCTTCGGTAGAAAATCAAAGGATCTTCttgagatcctttttttctgcgcgtaatctgctgcttgcaaacaaaaaaaccaccgctaccagcggtggtttgtttgccggatcaagagctaccaactctttttccgaggtaactggcttcagcagagcgcagataccaaatactgttcttctagtgtagccgtagttaggccaccacttcaagaactctgtagcaccgcctacatacctcgctctgctaatcctgttaccagtggctgctgccagtggcgataagtcgtgtcttaccgggttggactcaagacgatagttaccggataaggcgcagcggtcgggctgaacggggggttcgtgcacacagcccagcttggagcgaacgacctaca…
3741		plasmid	pLF3FShC mec-4p rtetR-QFAD	mec-4 promoter driving rtetR-QFAD in an RCME vector	this study	GAAGTTCCTATTCtctagaaaGTATAGGAACTTCATGAAAAAGCCTGAACTCACCGCGACGTCTGTCGAGAAGTTTCTGATCGAAAAGTTCGACAGCGTCTCCGACCTGATGCAGCTCTCGGAGGGCGAAGAATCTCGTGCTTTCAGCTTCGATGTAGGAGGGCGTGGATATGTCCTGCGGGTAAATAGCTGCGCCGATGGTTTCTACAAAGATCGTTATGTTTATCGGCACTTTGCATCGGCCGCGCTCCCGATTCCGGAAGTGCTTGACATTGGGGAATTCAGCGAGAGCCTGACCTATTGCATCTCCCGCCGTGCACAGGGTGTCACGTTGCAAGACCTGCCTGAAACCGAACTGCCCGCTGTTCTGCAGCCGGTCGCGGAGGCCATGGATGCGAT…
3743		plasmid	pBS UAS 11X GFP-C1	11 X UAS ∆pes-10 promoter driving GFP-C1 in pBluescript KS(+)	this study	cacctaaattgtaagcgttaatattttgttaaaattcgcgttaaatttttgttaaatcagctcattttttaaccaataggccgaaatcggcaaaatcccttataaatcaaaagaatagaccgagatagggttgagtgttgttccagtttggaacaagagtccactattaaagaacgtggactccaacgtcaaagggcgaaaaaccgtctatcagggcgatggcccactacgtgaaccatcaccctaatcaagttttttggggtcgaggtgccgtaaagcactaaatcggaaccctaaagggagcccccgatttagagcttgacggggaaagccggcgaacgtggcgagaaaggaagggaagaaagcgaaaggagcgggcgctagggcgctggcaagtgt…
3744		plasmid	pBS mec-4p rtetR-QF	mec-4 promoter driving rtetR-QFAD in pBluescript KS(+)	this study	cacctaaattgtaagcgttaatattttgttaaaattcgcgttaaatttttgttaaatcagctcattttttaaccaataggccgaaatcggcaaaatcccttataaatcaaaagaatagaccgagatagggttgagtgttgttccagtttggaacaagagtccactattaaagaacgtggactccaacgtcaaagggcgaaaaaccgtctatcagggcgatggcccactacgtgaaccatcaccctaatcaagttttttggggtcgaggtgccgtaaagcactaaatcggaaccctaaagggagcccccgatttagagcttgacggggaaagccggcgaacgtggcgagaaaggaagggaagaaagcgaaaggagcgggcgctagggcgctggcaagtgt…
3746		plasmid	DR274 CT-NT LoxP FLP FRT FRT3 landing	loxP FLP FRT FRT3 landing in a Golden Gate SapI GCG ACG assembly vector	this study	TGGGCCTTTCTTCGGTAGAAAATCAAAGGATCTTCttgagatcctttttttctgcgcgtaatctgctgcttgcaaacaaaaaaaccaccgctaccagcggtggtttgtttgccggatcaagagctaccaactctttttccgaggtaactggcttcagcagagcgcagataccaaatactgttcttctagtgtagccgtagttaggccaccacttcaagaactctgtagcaccgcctacatacctcgctctgctaatcctgttaccagtggctgctgccagtggcgataagtcgtgtcttaccgggttggactcaagacgatagttaccggataaggcgcagcggtcgggctgaacggggggttcgtgcacacagcccagcttggagcgaacgacctaca…
3749		plasmid	DR274 CT-NT loxP FRT FRT3 landing	loxP FRT FRT3 landing in a Golden Gate SapI GCG ACG assembly vector	this study	TGGGCCTTTCTTCGGTAGAAAATCAAAGGATCTTCttgagatcctttttttctgcgcgtaatctgctgcttgcaaacaaaaaaaccaccgctaccagcggtggtttgtttgccggatcaagagctaccaactctttttccgaggtaactggcttcagcagagcgcagataccaaatactgttcttctagtgtagccgtagttaggccaccacttcaagaactctgtagcaccgcctacatacctcgctctgctaatcctgttaccagtggctgctgccagtggcgataagtcgtgtcttaccgggttggactcaagacgatagttaccggataaggcgcagcggtcgggctgaacggggggttcgtgcacacagcccagcttggagcgaacgacctaca…
3751		plasmid	DR274 AAG GTA act-4 3'UTR	act-4 3' UTR in a Golden Gate SapI AAG GTA assembly vector	this study	gAAGTAAattttttgccccttccacccacaacgctcaaaagaagttcgtattatcccgcaacccatccagaccatccttttacattttttttattttctcttttttttttcttcaccctctccgtgtacattgctagtaatagttccaacttctctagccgactgcattatgcttcccattctcacccaaatcttcattggtaacttctcttgtatttgttcaatactattccggtagtaatctaggcatgtataactaggttctctgtgtatctttggtttgaagttgaggtttaatgcaatcacttttgttgttgtaccctattactgccgatgacccccattttctcattacaaaattgacattttaaaccattttttctctgaatcatgctcatt…
3752		plasmid	pLF3FShC mec-4p rtetR-QF tetO 7x GFP-C1	mec-4 promoter driving rtetR-QFAD & tetO 7X ∆pes-10 promoter driving GFP-C1 in an RCME vector	this study	GAAGTTCCTATTCtctagaaaGTATAGGAACTTCATGAAAAAGCCTGAACTCACCGCGACGTCTGTCGAGAAGTTTCTGATCGAAAAGTTCGACAGCGTCTCCGACCTGATGCAGCTCTCGGAGGGCGAAGAATCTCGTGCTTTCAGCTTCGATGTAGGAGGGCGTGGATATGTCCTGCGGGTAAATAGCTGCGCCGATGGTTTCTACAAAGATCGTTATGTTTATCGGCACTTTGCATCGGCCGCGCTCCCGATTCCGGAAGTGCTTGACATTGGGGAATTCAGCGAGAGCCTGACCTATTGCATCTCCCGCCGTGCACAGGGTGTCACGTTGCAAGACCTGCCTGAAACCGAACTGCCCGCTGTTCTGCAGCCGGTCGCGGAGGCCATGGATGCGAT…
3754		plasmid	pLF3FShC mec-4p gal4-QF UAS 11x GFP-C1	mec-4 promoter driving GAL4-QF & 11X UAS ∆pes-10 promoter driving GFP-C1 in an RCME vector	this study	GAAGTTCCTATTCtctagaaaGTATAGGAACTTCATGAAAAAGCCTGAACTCACCGCGACGTCTGTCGAGAAGTTTCTGATCGAAAAGTTCGACAGCGTCTCCGACCTGATGCAGCTCTCGGAGGGCGAAGAATCTCGTGCTTTCAGCTTCGATGTAGGAGGGCGTGGATATGTCCTGCGGGTAAATAGCTGCGCCGATGGTTTCTACAAAGATCGTTATGTTTATCGGCACTTTGCATCGGCCGCGCTCCCGATTCCGGAAGTGCTTGACATTGGGGAATTCAGCGAGAGCCTGACCTATTGCATCTCCCGCCGTGCACAGGGTGTCACGTTGCAAGACCTGCCTGAAACCGAACTGCCCGCTGTTCTGCAGCCGGTCGCGGAGGCCATGGATGCGAT…
3755	154116	plasmid	pLF3FShC tetO 7X GFP-C1 act-4 3'UTR	tetO 7X ∆pes-10 promoter driving GFP-C1 & an act-4 3' UTR in a RMCE vector	this study	GAAGTTCCTATTCtctagaaaGTATAGGAACTTCATGAAAAAGCCTGAACTCACCGCGACGTCTGTCGAGAAGTTTCTGATCGAAAAGTTCGACAGCGTCTCCGACCTGATGCAGCTCTCGGAGGGCGAAGAATCTCGTGCTTTCAGCTTCGATGTAGGAGGGCGTGGATATGTCCTGCGGGTAAATAGCTGCGCCGATGGTTTCTACAAAGATCGTTATGTTTATCGGCACTTTGCATCGGCCGCGCTCCCGATTCCGGAAGTGCTTGACATTGGGGAATTCAGCGAGAGCCTGACCTATTGCATCTCCCGCCGTGCACAGGGTGTCACGTTGCAAGACCTGCCTGAAACCGAACTGCCCGCTGTTCTGCAGCCGGTCGCGGAGGCCATGGATGCGAT…
3756		plasmid	pLF3FShC tetO 7X mCherry	tetO 7X ∆pes-10 promoter driving mCherry	this study	GAAGTTCCTATTCtctagaaaGTATAGGAACTTCATGAAAAAGCCTGAACTCACCGCGACGTCTGTCGAGAAGTTTCTGATCGAAAAGTTCGACAGCGTCTCCGACCTGATGCAGCTCTCGGAGGGCGAAGAATCTCGTGCTTTCAGCTTCGATGTAGGAGGGCGTGGATATGTCCTGCGGGTAAATAGCTGCGCCGATGGTTTCTACAAAGATCGTTATGTTTATCGGCACTTTGCATCGGCCGCGCTCCCGATTCCGGAAGTGCTTGACATTGGGGAATTCAGCGAGAGCCTGACCTATTGCATCTCCCGCCGTGCACAGGGTGTCACGTTGCAAGACCTGCCTGAAACCGAACTGCCCGCTGTTCTGCAGCCGGTCGCGGAGGCCATGGATGCGAT…
3767		plasmid	DR274 GCG ATG mec-7bp	∆mec-7 basal promoter in a Golden Gate SapI GCG ATG assembly vector	this study	gttggaacctcttacgtgccGATCAAGTCAAAAGCCTCCGGTCGGAGGCTTTTGACTTTCTGCTATGGAGGTCAGGTATGATTTttGAATTCGCTCTTCgGCGagatgtgactcctcccattattcgtcttgagtcgcatcttttgtcttggtccgttgtcagtcgagcctcaaggcagccgttccgccagtgatcgcctgctaagaagttgtaggtgtagaggaagaaacgtcgggtccaaatttcaagcaacATGaGAAGAGCAAGCTTGGATCGACGAGAGCAGCGCGACTGGATCTGTCGCCCGTCTCAAACGCAACCCTCCGGCGGTCGCATATCATTCAGGACGAGCCTCAGACTCCAGCGTAACTGGACTGCAATCAACTCACTGGCTCACC…
3768		plasmid	DR274 GCG ATG myo-2bp	∆myo-2 basal promoter in a Golden Gate SapI GCG ATG assembly vector	this study	TGGGCCTTTCTTCGGTAGAAAATCAAAGGATCTTCttgagatcctttttttctgcgcgtaatctgctgcttgcaaacaaaaaaaccaccgctaccagcggtggtttgtttgccggatcaagagctaccaactctttttccgaggtaactggcttcagcagagcgcagataccaaatactgttcttctagtgtagccgtagttaggccaccacttcaagaactctgtagcaccgcctacatacctcgctctgctaatcctgttaccagtggctgctgccagtggcgataagtcgtgtcttaccgggttggactcaagacgatagttaccggataaggcgcagcggtcgggctgaacggggggttcgtgcacacagcccagcttggagcgaacgacctaca…
3769		plasmid	DR274 GCG ATG hsp-16.1bp	∆hsp-16.1 basal promoter in a Golden Gate SapI GCG ATG assembly vector	this study	TGGGCCTTTCTTCGGTAGAAAATCAAAGGATCTTCttgagatcctttttttctgcgcgtaatctgctgcttgcaaacaaaaaaaccaccgctaccagcggtggtttgtttgccggatcaagagctaccaactctttttccgaggtaactggcttcagcagagcgcagataccaaatactgttcttctagtgtagccgtagttaggccaccacttcaagaactctgtagcaccgcctacatacctcgctctgctaatcctgttaccagtggctgctgccagtggcgataagtcgtgtcttaccgggttggactcaagacgatagttaccggataaggcgcagcggtcgggctgaacggggggttcgtgcacacagcccagcttggagcgaacgacctaca…
3770		plasmid	DR274 TGG GCG tetO 7X	tetO 7X enhancer in a Golden Gate SapI TGG GCG assembly vector	this study	TGGGCCTTTCTTCGGTAGAAAATCAAAGGATCTTCttgagatcctttttttctgcgcgtaatctgctgcttgcaaacaaaaaaaccaccgctaccagcggtggtttgtttgccggatcaagagctaccaactctttttccgaggtaactggcttcagcagagcgcagataccaaatactgttcttctagtgtagccgtagttaggccaccacttcaagaactctgtagcaccgcctacatacctcgctctgctaatcctgttaccagtggctgctgccagtggcgataagtcgtgtcttaccgggttggactcaagacgatagttaccggataaggcgcagcggtcgggctgaacggggggttcgtgcacacagcccagcttggagcgaacgacctaca…
3773		plasmid	DR274 CT-NT -BsaI II	A Golden Gate SapI GCG ACG assembly vector	this study	TGGGCCTTTCTTCGGTAGAAAATCAAAGGATCTTCttgagatcctttttttctgcgcgtaatctgctgcttgcaaacaaaaaaaccaccgctaccagcggtggtttgtttgccggatcaagagctaccaactctttttccgaggtaactggcttcagcagagcgcagataccaaatactgttcttctagtgtagccgtagttaggccaccacttcaagaactctgtagcaccgcctacatacctcgctctgctaatcctgttaccagtggctgctgccagtggcgataagtcgtgtcttaccgggttggactcaagacgatagttaccggataaggcgcagcggtcgggctgaacggggggttcgtgcacacagcccagcttggagcgaacgacctaca…
3774	154117	plasmid	pLFF3SHC tetO 7X ∆mec-7p GFP-C1	tetO 7X enhancer with ∆mec-7 basal promoter driving GFP-C1	this study	GAAGTTCCTATTCtctagaaaGTATAGGAACTTCATGAAAAAGCCTGAACTCACCGCGACGTCTGTCGAGAAGTTTCTGATCGAAAAGTTCGACAGCGTCTCCGACCTGATGCAGCTCTCGGAGGGCGAAGAATCTCGTGCTTTCAGCTTCGATGTAGGAGGGCGTGGATATGTCCTGCGGGTAAATAGCTGCGCCGATGGTTTCTACAAAGATCGTTATGTTTATCGGCACTTTGCATCGGCCGCGCTCCCGATTCCGGAAGTGCTTGACATTGGGGAATTCAGCGAGAGCCTGACCTATTGCATCTCCCGCCGTGCACAGGGTGTCACGTTGCAAGACCTGCCTGAAACCGAACTGCCCGCTGTTCTGCAGCCGGTCGCGGAGGCCATGGATGCGAT…
3775		plasmid	pLFF3SHC tetO 7X ∆myo-2p GFP-C1	tetO 7X enhancer with ∆myo-2 basal promoter driving GFP-C1	this study	GAAGTTCCTATTCtctagaaaGTATAGGAACTTCATGAAAAAGCCTGAACTCACCGCGACGTCTGTCGAGAAGTTTCTGATCGAAAAGTTCGACAGCGTCTCCGACCTGATGCAGCTCTCGGAGGGCGAAGAATCTCGTGCTTTCAGCTTCGATGTAGGAGGGCGTGGATATGTCCTGCGGGTAAATAGCTGCGCCGATGGTTTCTACAAAGATCGTTATGTTTATCGGCACTTTGCATCGGCCGCGCTCCCGATTCCGGAAGTGCTTGACATTGGGGAATTCAGCGAGAGCCTGACCTATTGCATCTCCCGCCGTGCACAGGGTGTCACGTTGCAAGACCTGCCTGAAACCGAACTGCCCGCTGTTCTGCAGCCGGTCGCGGAGGCCATGGATGCGAT…
3776		plasmid	pLFF3SHC tetO 7X ∆hsp-16p GFP-C1	tetO 7X enhancer with ∆hsp-16.1 basal promoter driving GFP-C1	this study	GAAGTTCCTATTCtctagaaaGTATAGGAACTTCATGAAAAAGCCTGAACTCACCGCGACGTCTGTCGAGAAGTTTCTGATCGAAAAGTTCGACAGCGTCTCCGACCTGATGCAGCTCTCGGAGGGCGAAGAATCTCGTGCTTTCAGCTTCGATGTAGGAGGGCGTGGATATGTCCTGCGGGTAAATAGCTGCGCCGATGGTTTCTACAAAGATCGTTATGTTTATCGGCACTTTGCATCGGCCGCGCTCCCGATTCCGGAAGTGCTTGACATTGGGGAATTCAGCGAGAGCCTGACCTATTGCATCTCCCGCCGTGCACAGGGTGTCACGTTGCAAGACCTGCCTGAAACCGAACTGCCCGCTGTTCTGCAGCCGGTCGCGGAGGCCATGGATGCGAT…
3777		plasmid	DR274 3'arm tbb-2 UTR	tbb-2 3' UTR in a Golden Gate SapI ACG GTA assembly vector	this study	TGGGCCTTTCTTCGGTAGAAAATCAAAGGATCTTCttgagatcctttttttctgcgcgtaatctgctgcttgcaaacaaaaaaaccaccgctaccagcggtggtttgtttgccggatcaagagctaccaactctttttccgaggtaactggcttcagcagagcgcagataccaaatactgttcttctagtgtagccgtagttaggccaccacttcaagaactctgtagcaccgcctacatacctcgctctgctaatcctgttaccagtggctgctgccagtggcgataagtcgtgtcttaccgggttggactcaagacgatagttaccggataaggcgcagcggtcgggctgaacggggggttcgtgcacacagcccagcttggagcgaacgacctaca…
3791		plasmid	DR274 GGT GCG QF2n DB	QF DNA binding domain in a Golden Gate SapI GGT GCG assembly vector	this study	AATTCGCTCTTCgGGTATGCCGCCTAAACGCAAGACACTCAATGCCGCTGCCGAAGCCAATGCCCACGCTGATGGCCATGCTGATGGCAATGCTGATGGTCATGTCGCTAACACTGCAGCAAGCAGCAACAACGCCCGTTTTGCGGACTTGACCAACATTGACACACCCGGCCTCGGCCCTACCACGACGACGTTACTTGTCGAGCCCGCTCGTTCGAAACGCCAGAGAGTCTCGAGGGCCTGTGATCAGTGTCGAGCTGCACGTGAAAAGTGTGATGGAATCCAGCCGGCTTGCTTCCCCTGTGTGTCGCAGGGCCGGTCGTGTACCTACCAGGCCAGTCCCAAGAAGCGAGGAGTCCAGACGGGCTACATCCGCACTCTCGAACTGGCTCTGGCTTG…
3800		plasmid	DR274 CT-NT QF2 AD	QF DNA binding domain in a Golden Gate SapI GCG ACG assembly vector	this study	TGGGCCTTTCTTCGGTAGAAAATCAAAGGATCTTCttgagatcctttttttctgcgcgtaatctgctgcttgcaaacaaaaaaaccaccgctaccagcggtggtttgtttgccggatcaagagctaccaactctttttccgaggtaactggcttcagcagagcgcagataccaaatactgttcttctagtgtagccgtagttaggccaccacttcaagaactctgtagcaccgcctacatacctcgctctgctaatcctgttaccagtggctgctgccagtggcgataagtcgtgtcttaccgggttggactcaagacgatagttaccggataaggcgcagcggtcgggctgaacggggggttcgtgcacacagcccagcttggagcgaacgacctaca…
3808		plasmid	DR274 CT-NT linker-QFAD	Flex linker and QFAD in a Golden Gate SapI GCG ACG assembly vector	this study	TGGGCCTTTCTTCGGTAGAAAATCAAAGGATCTTCttgagatcctttttttctgcgcgtaatctgctgcttgcaaacaaaaaaaccaccgctaccagcggtggtttgtttgccggatcaagagctaccaactctttttccgaggtaactggcttcagcagagcgcagataccaaatactgttcttctagtgtagccgtagttaggccaccacttcaagaactctgtagcaccgcctacatacctcgctctgctaatcctgttaccagtggctgctgccagtggcgataagtcgtgtcttaccgggttggactcaagacgatagttaccggataaggcgcagcggtcgggctgaacggggggttcgtgcacacagcccagcttggagcgaacgacctaca…
3810	154119	plasmid	pLF3fShC mec-4p QF act-4 3'UTR	mec-4 promoter driving QF in an RCME vector	this study	GAAGTTCCTATTCtctagaaaGTATAGGAACTTCATGAAAAAGCCTGAACTCACCGCGACGTCTGTCGAGAAGTTTCTGATCGAAAAGTTCGACAGCGTCTCCGACCTGATGCAGCTCTCGGAGGGCGAAGAATCTCGTGCTTTCAGCTTCGATGTAGGAGGGCGTGGATATGTCCTGCGGGTAAATAGCTGCGCCGATGGTTTCTACAAAGATCGTTATGTTTATCGGCACTTTGCATCGGCCGCGCTCCCGATTCCGGAAGTGCTTGACATTGGGGAATTCAGCGAGAGCCTGACCTATTGCATCTCCCGCCGTGCACAGGGTGTCACGTTGCAAGACCTGCCTGAAACCGAACTGCCCGCTGTTCTGCAGCCGGTCGCGGAGGCCATGGATGCGAT…
3811	154120	plasmid	pLF3fShC mec-4p QF2 act-4 3'UTR	mec-4 promoter driving QF2 in an RCME vector	this study	GAAGTTCCTATTCtctagaaaGTATAGGAACTTCATGAAAAAGCCTGAACTCACCGCGACGTCTGTCGAGAAGTTTCTGATCGAAAAGTTCGACAGCGTCTCCGACCTGATGCAGCTCTCGGAGGGCGAAGAATCTCGTGCTTTCAGCTTCGATGTAGGAGGGCGTGGATATGTCCTGCGGGTAAATAGCTGCGCCGATGGTTTCTACAAAGATCGTTATGTTTATCGGCACTTTGCATCGGCCGCGCTCCCGATTCCGGAAGTGCTTGACATTGGGGAATTCAGCGAGAGCCTGACCTATTGCATCTCCCGCCGTGCACAGGGTGTCACGTTGCAAGACCTGCCTGAAACCGAACTGCCCGCTGTTCTGCAGCCGGTCGCGGAGGCCATGGATGCGAT…
3813	154121	plasmid	pLF3fShC mec-4p lexA-L-QF act-4 3'UTR	mec-4 promoter driving lexA-L-QFAD in an RCME vector	this study	GAAGTTCCTATTCtctagaaaGTATAGGAACTTCATGAAAAAGCCTGAACTCACCGCGACGTCTGTCGAGAAGTTTCTGATCGAAAAGTTCGACAGCGTCTCCGACCTGATGCAGCTCTCGGAGGGCGAAGAATCTCGTGCTTTCAGCTTCGATGTAGGAGGGCGTGGATATGTCCTGCGGGTAAATAGCTGCGCCGATGGTTTCTACAAAGATCGTTATGTTTATCGGCACTTTGCATCGGCCGCGCTCCCGATTCCGGAAGTGCTTGACATTGGGGAATTCAGCGAGAGCCTGACCTATTGCATCTCCCGCCGTGCACAGGGTGTCACGTTGCAAGACCTGCCTGAAACCGAACTGCCCGCTGTTCTGCAGCCGGTCGCGGAGGCCATGGATGCGAT…
3814	154122	plasmid	pLF3fShC mec-4p rtetR-L-QF act-4 3'UTR	mec-4 promoter driving tetR-L-QFAD in an RCME vector	this study	GAAGTTCCTATTCtctagaaaGTATAGGAACTTCATGAAAAAGCCTGAACTCACCGCGACGTCTGTCGAGAAGTTTCTGATCGAAAAGTTCGACAGCGTCTCCGACCTGATGCAGCTCTCGGAGGGCGAAGAATCTCGTGCTTTCAGCTTCGATGTAGGAGGGCGTGGATATGTCCTGCGGGTAAATAGCTGCGCCGATGGTTTCTACAAAGATCGTTATGTTTATCGGCACTTTGCATCGGCCGCGCTCCCGATTCCGGAAGTGCTTGACATTGGGGAATTCAGCGAGAGCCTGACCTATTGCATCTCCCGCCGTGCACAGGGTGTCACGTTGCAAGACCTGCCTGAAACCGAACTGCCCGCTGTTCTGCAGCCGGTCGCGGAGGCCATGGATGCGAT…
3817		plasmid	DR274 GGT GCG tTA(iS) DB	tetR with stop codons in the intron in a Golden Gate SapI GGT GCG assembly vector	this study	AATTCGCTCTTCgGGTATGTCCCGTCTGGACAAGTCCAAGGTCATCAACTCCGCCCTCGAGCTCCTCAATGAGGTCGGAATTGAGGGACTCACCACCCGTAAGCTCGCCCAAAAGCTCGGAGTTGAGCAACCAACCCTCTACTGGCACGTCAAGAACAAGCGTGCACTTCTCGACGCCCTCGCCATCGAGATGCTCGATCGTCACCACACCCACTTCTGCCCACTCGAGGGAGAATCCTGGCAAGATTTCCTCCGTAACAACGCCAAGTCCTTCCGTTGCGCCCTTCTCTCCCACCGTGACGGAGCCAAGgtaagtttaaacatatatatactaactaaccctgattaAtGaaattttcagGTCCATCTCGGAACCCGTCCAACCGAGAAGCAATACGA…
3821		plasmid	DR274 FP tetR(iS)-L-QF	tetR(iS)-L-QF activator in a Golden Gate SapI ATG AAG assembly vector	this study	TGGGCCTTTCTTCGGTAGAAAATCAAAGGATCTTCttgagatcctttttttctgcgcgtaatctgctgcttgcaaacaaaaaaaccaccgctaccagcggtggtttgtttgccggatcaagagctaccaactctttttccgaggtaactggcttcagcagagcgcagataccaaatactgttcttctagtgtagccgtagttaggccaccacttcaagaactctgtagcaccgcctacatacctcgctctgctaatcctgttaccagtggctgctgccagtggcgataagtcgtgtcttaccgggttggactcaagacgatagttaccggataaggcgcagcggtcgggctgaacggggggttcgtgcacacagcccagcttggagcgaacgacctaca…
3823	154123	plasmid	pLF3FShC mec-4p tetR-L-QF	mec-4 promoter driving tetR-L-QFAD in an RCME vector	this study	GAAGTTCCTATTCtctagaaaGTATAGGAACTTCATGAAAAAGCCTGAACTCACCGCGACGTCTGTCGAGAAGTTTCTGATCGAAAAGTTCGACAGCGTCTCCGACCTGATGCAGCTCTCGGAGGGCGAAGAATCTCGTGCTTTCAGCTTCGATGTAGGAGGGCGTGGATATGTCCTGCGGGTAAATAGCTGCGCCGATGGTTTCTACAAAGATCGTTATGTTTATCGGCACTTTGCATCGGCCGCGCTCCCGATTCCGGAAGTGCTTGACATTGGGGAATTCAGCGAGAGCCTGACCTATTGCATCTCCCGCCGTGCACAGGGTGTCACGTTGCAAGACCTGCCTGAAACCGAACTGCCCGCTGTTCTGCAGCCGGTCGCGGAGGCCATGGATGCGAT…
